# Supplementary material for: Genome-wide atlas of gene expression in the adult mouse brain
Source: Springer Nature journal article supplement (doi:10.1038/nature05453), 2006-12-06
Supplement: 41586_2007_BFnature05453_MOESM6_ESM.pdf [file 41586_2007_BFnature05453_MOESM6_ESM.pdf]

# **Cross Platform Validation- Figure 2**

0610009A07Rik

Allen Brain Atlas

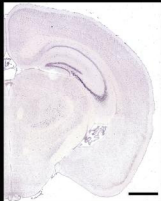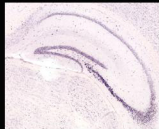

Lein et al., 2004

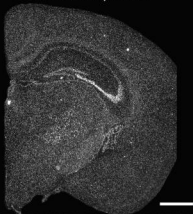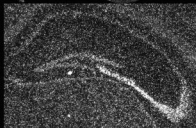

Anxa11

Allen Brain Atlas

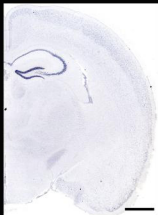

Lein et al., 2004

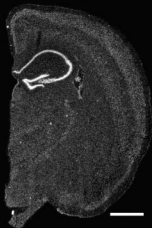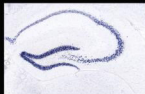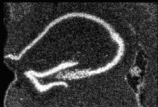

Atp1a1

Allen Brain Atlas

Lein et al, 2004

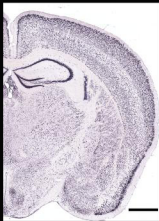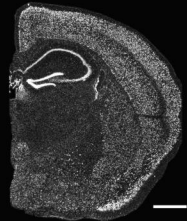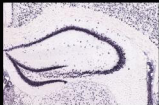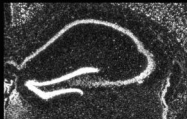



Atp2a2

Allen Brain Atlas

Lein et al, 2004

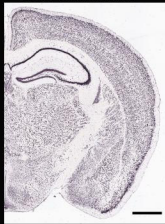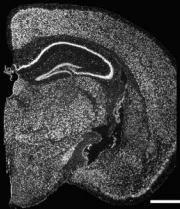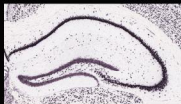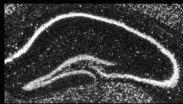

Bok

Allen Brain Atlas

Lein et al., 2004

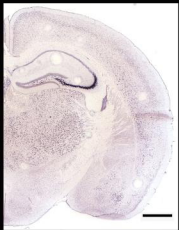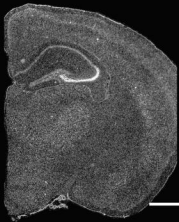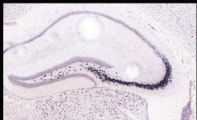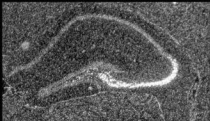

Btg1

Allen Brain Atlas

Lein et al, 2004

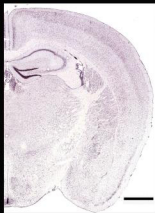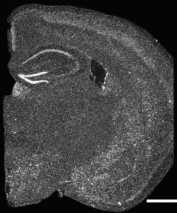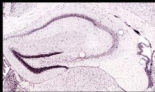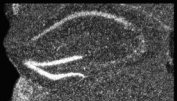

Cadps

Allen Brain Atlas

Lein et al., 2004

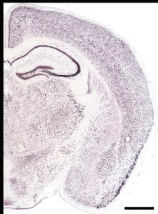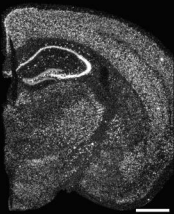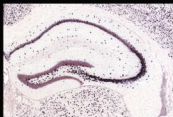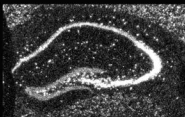

Calb 1

Allen Brain Atlas

Lein et al., 2004

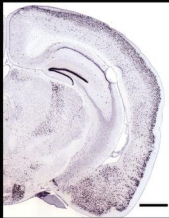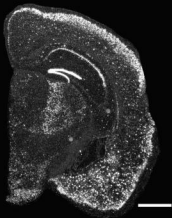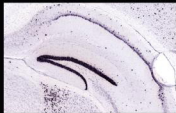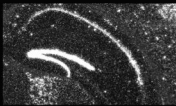

Calb2

Allen Brain Atlas

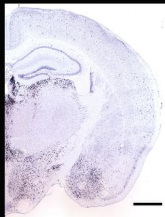

Lein et al, 2004

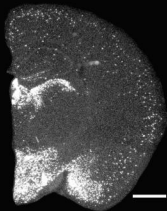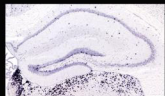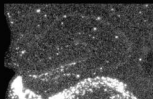

Camk2g

Allen Brain Atlas

Lein et al, 2004

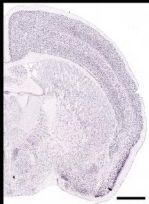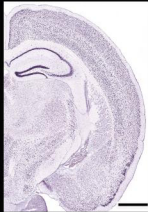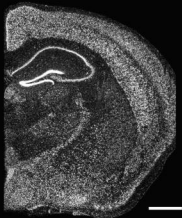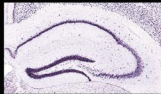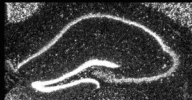

Car4

Allen Brain Atlas

Lein et al., 2004

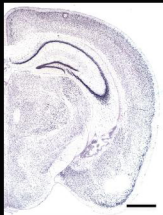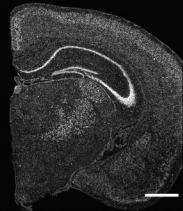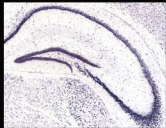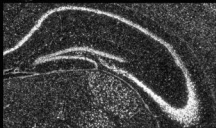



Ccnd2

Allen Brain Atlas

Lein et al., 2004

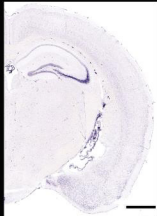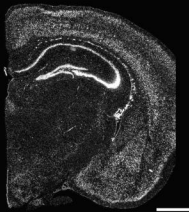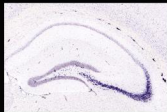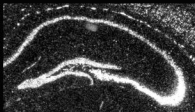

D0H4S114

Allen Brain Atlas

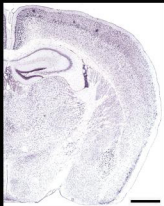

Lein et al., 2004

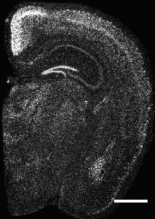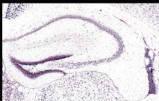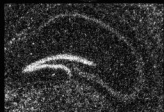

Darc

Allen Brain Atlas

Lein et al., 2004

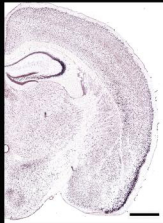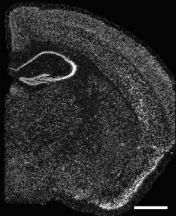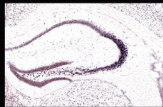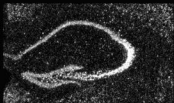

Dgat2

Allen Brain Atlas

Lein et al., 2004

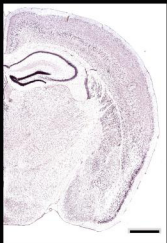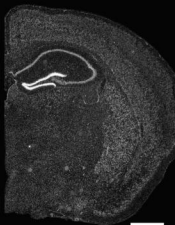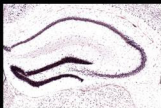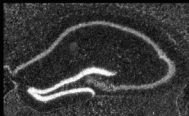

Dlat

Allen Brain Atlas

Lein et al., 2004

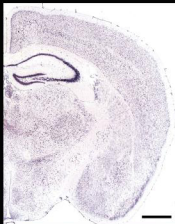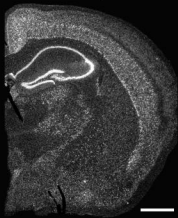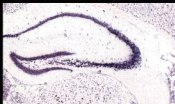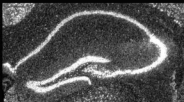

# Dusp1

Allen Brain Atlas

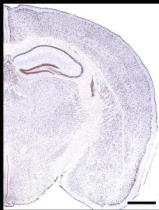

Lein et al, 2004

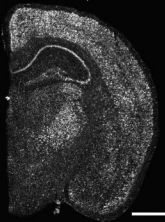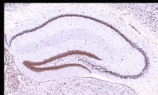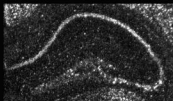

# Elavl2

Allen Brain Atlas

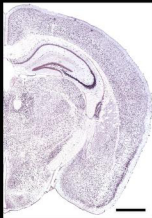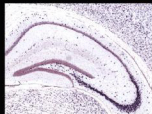

Lein et al., 2004

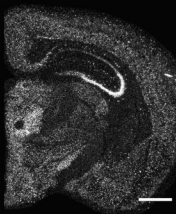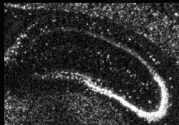

Enpp2

Allen Brain Atlas

Lein et al., 2001

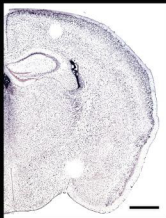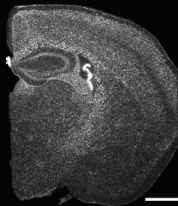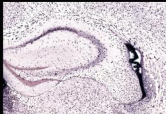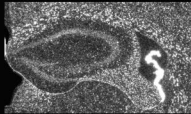



Etv1

Allen Brain Atlas

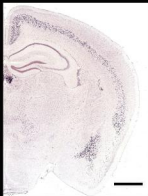

Lein et al., 2004

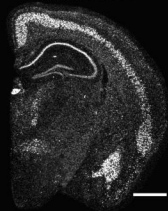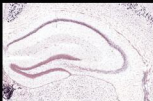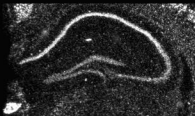

Fbln1

Allen Brain Atlas

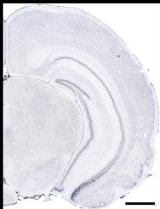

Lein et al., 2004

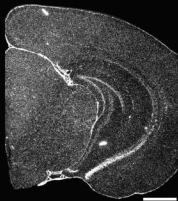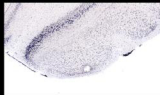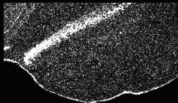

Fn1

Allen Brain Atlas

Lein et al., 2004

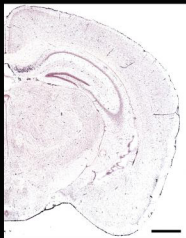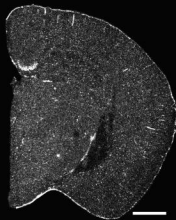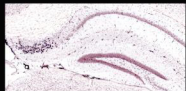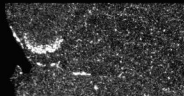

Frzb

Allen Brain Atlas

Lein et al., 2004

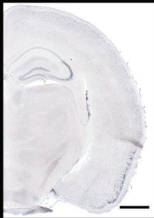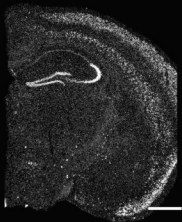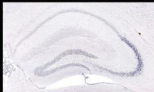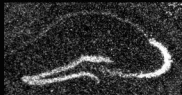

Igfbp5

Allen Brain Atlas

Lein et al, 2004

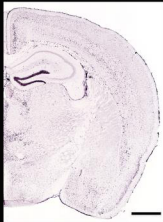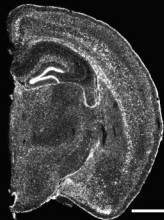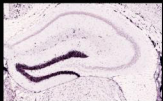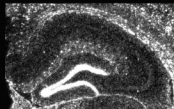

Itpr1

Allen Brain Atlas

Lein et al, 2004

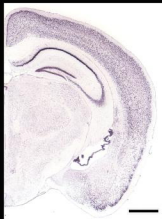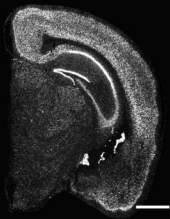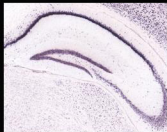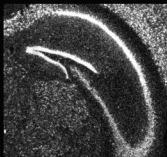

Jun

Allen Brain Atlas

Lein et al, 2004

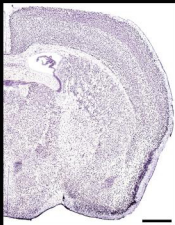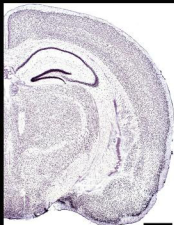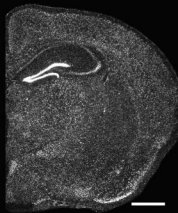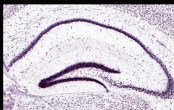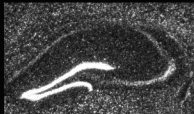

Kcnj9

Allen Brain Atlas

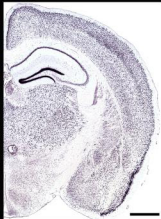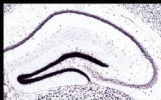

Lein et al., 2004

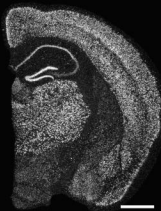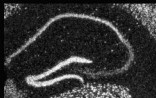



KI

Allen Brain Atlas

Lein et al., 2004

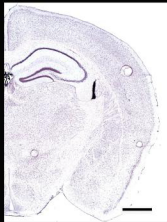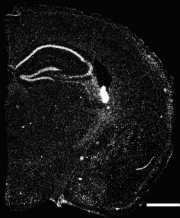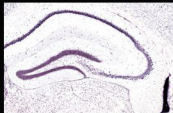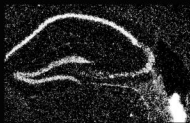

Klk8

Allen Brain Atlas

Lein et al., 2004

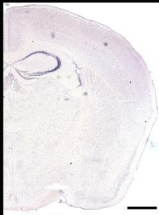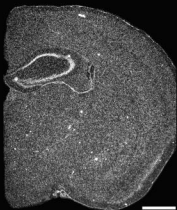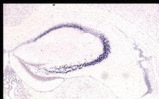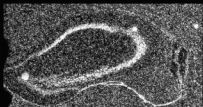

Lpl

Allen Brain Atlas

Lein et al., 2004

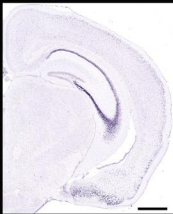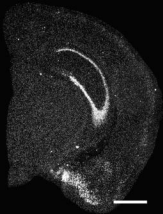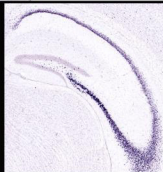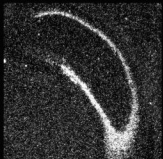

Lxn

Allen Brain Atlas

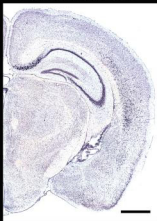

Lein et al., 2004

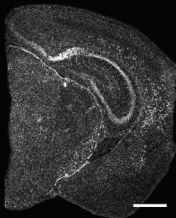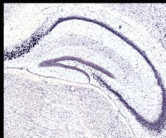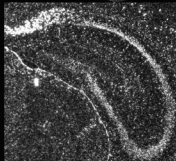

Man1a

Allen Brain Atlas

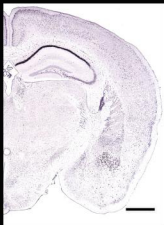

Lein et al., 2004

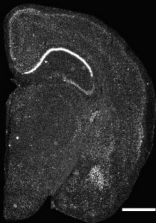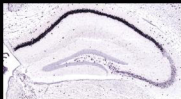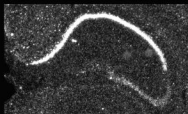

Mbp

Allen Brain Atlas

Lein et al, 2004

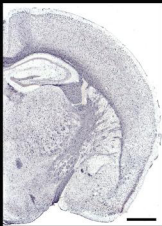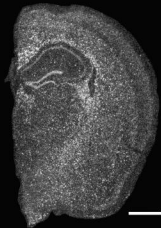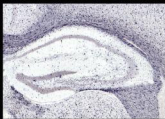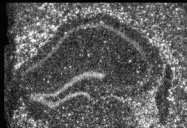

Mcm6

Allen Brain Atlas

Lein et al., 2004

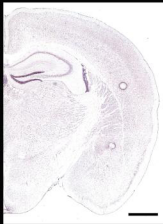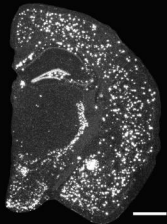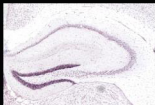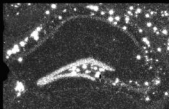

Mrg1

Allen Brain Atlas

Lein et al., 2004

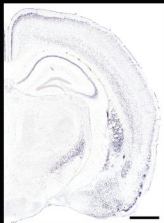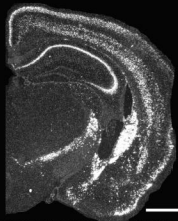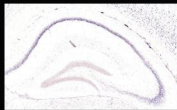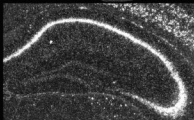



Myo5b

Allen Brain Atlas

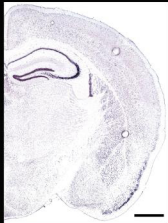

Lein et al., 2004

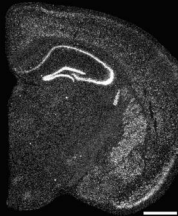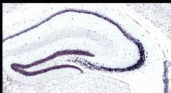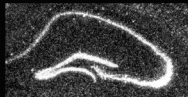

Nefl

Allen Brain Atlas

Lein et al., 2004

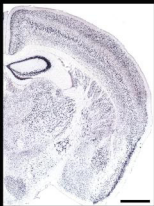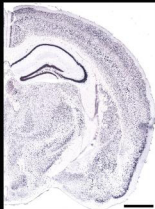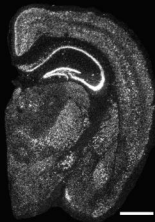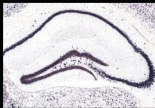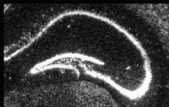

Net1

Allen Brain Atlas

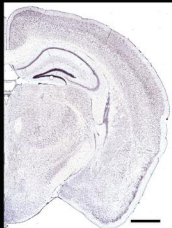

Lein et al, 2004

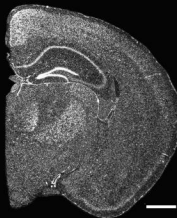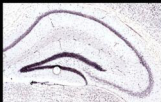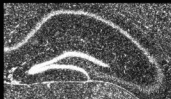

Ngef

Allen Brain Atlas

Lein et al., 2004

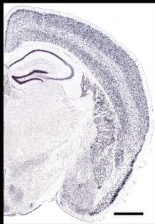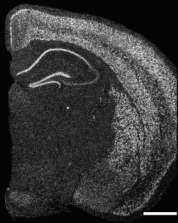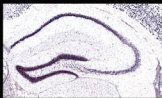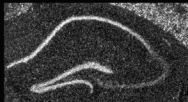

Nov

Allen Brain Atlas

Lein et al., 2004

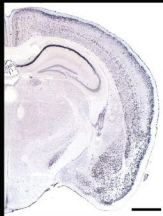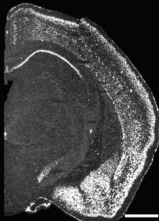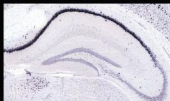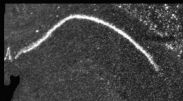

Npnt

Allen Brain Atlas

Lein et al., 2004

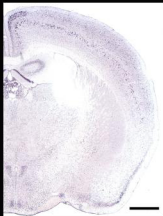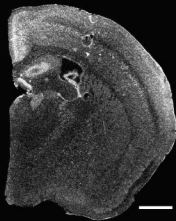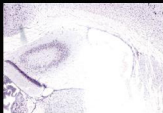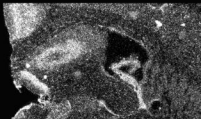

Ntf3

Allen Brain Atlas

Lein et al, 2004

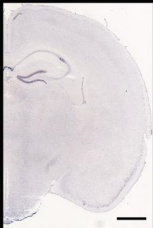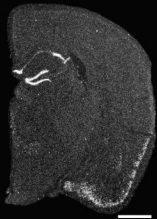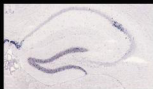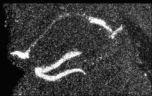

Npr3

Allen Brain Atlas

Lein et al., 2004

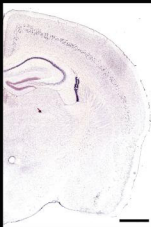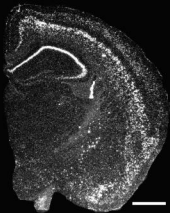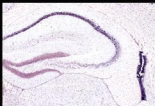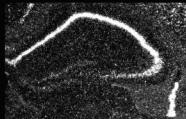



Pbx3

Allen Brain Atlas

Lein et al, 2004

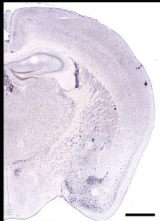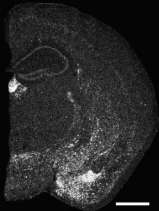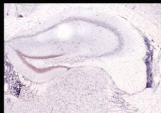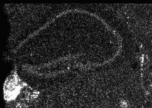

Pcp4

Allen Brain Atlas

Lein et al, 2004

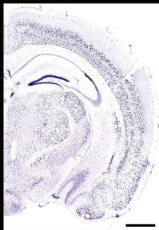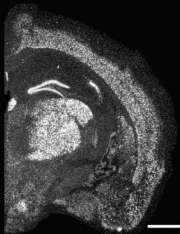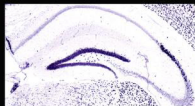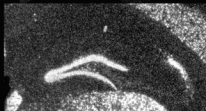

Pfcp

Allen Brain Atlas

Lein et al., 2004

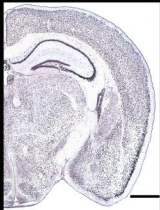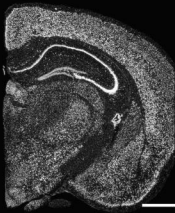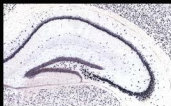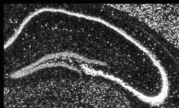

Pkia

Allen Brain Atlas

Lein et al, 2004

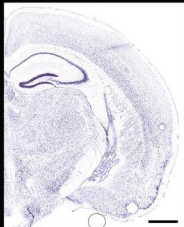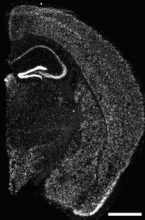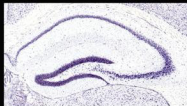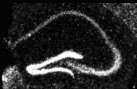

Prkcd

Allen Brain Atlas

Lein et al., 2004

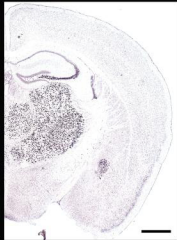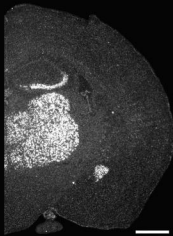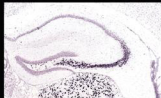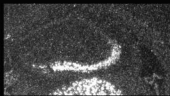

Prss12

Allen Brain Atlas

Lein et al., 2004

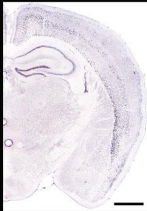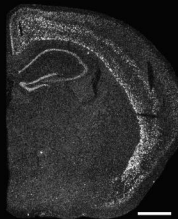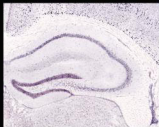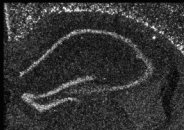

Ptpro

Allen Brain Atlas

Lein et al., 2004

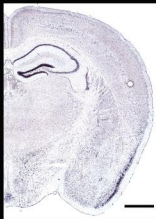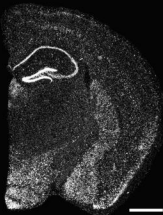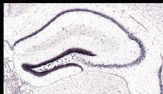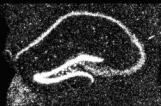

Pvalb

Allen Brain Atlas

Lein et al, 2004

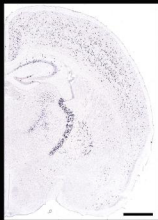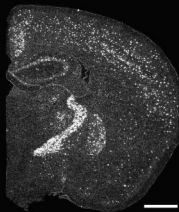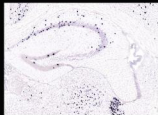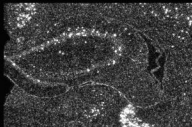



# Rab3b

Allen Brain Atlas

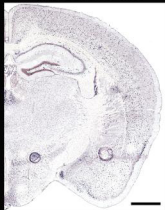

Lein et al., 2004

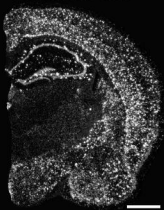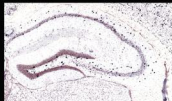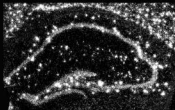

Rab3ip

Allen Brain Atlas

Lein et al., 2004

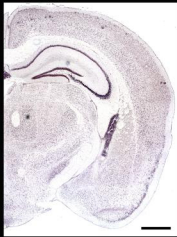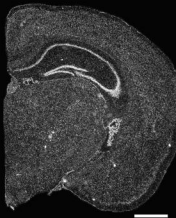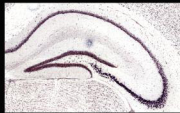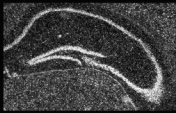

Rbp4

Allen Brain Atlas

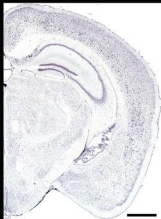

Lein et al., 2004

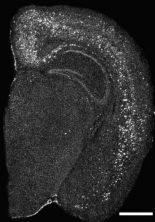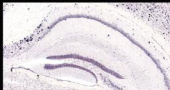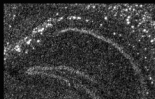

# Satb1

Allen Brain Atlas

Lein et al, 2004

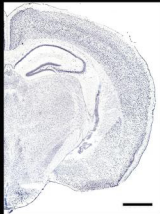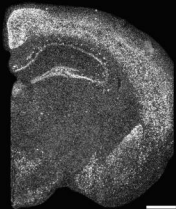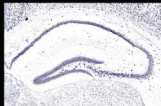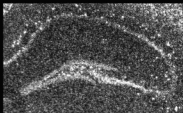

Sez6

Allen Brain Atlas

Lein et al., 2004

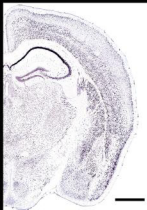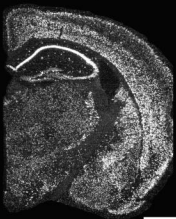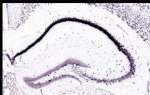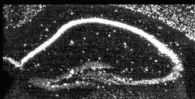

Sh3gl2

Allen Brain Atlas

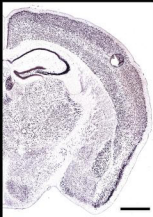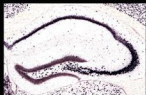

Lein et al, 2004

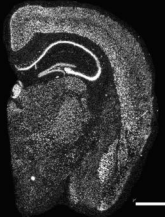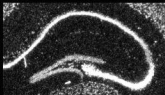

Slc31a1

Allen Brain Atlas

Lein et al., 2004

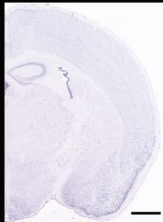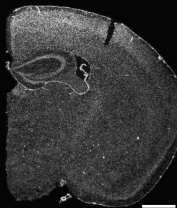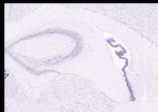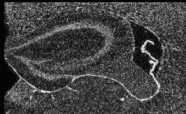

Slc39a6

Allen Brain Atlas

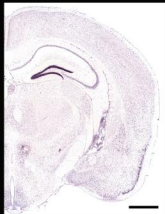

Lein et al., 2004

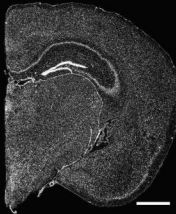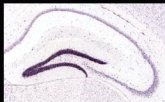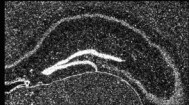



Sms

Allen Brain Atlas

Lein et al., 2004

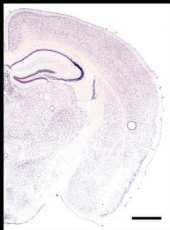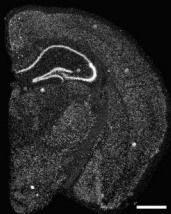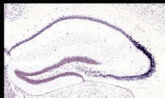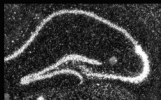

# Snap91

Allen Brain Atlas

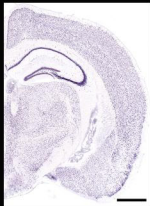

Lein et al., 2004

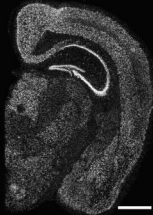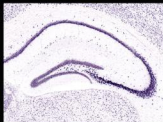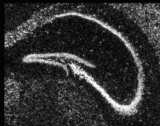

Snca

Allen Brain Atlas

Lein et al, 2004

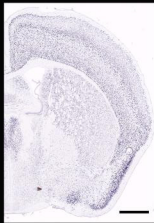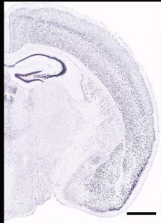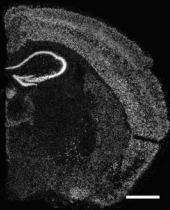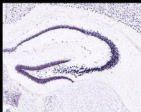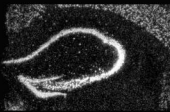

Spock1

Allen Brain Atlas

Lein et al., 2004

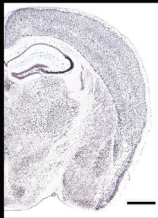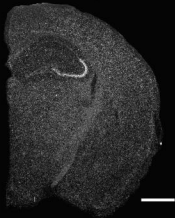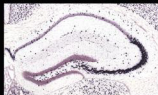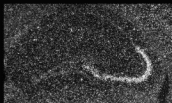

St8sia5

Allen Brain Atlas

Lein et al., 2004

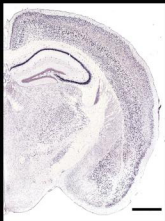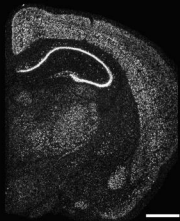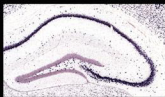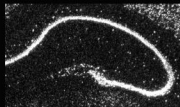

Stmn1

Allen Brain Atlas

Lein et al, 2004

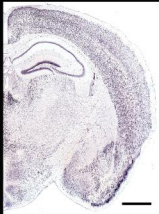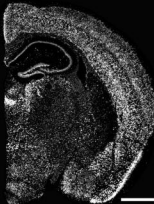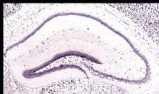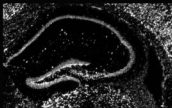

Syt2

Allen Brain Atlas

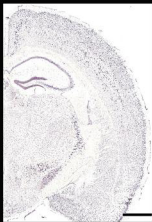

Lein et al, 2004

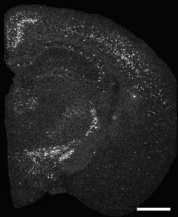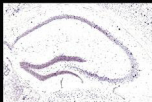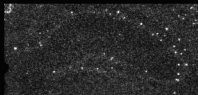

Tgfb2

Allen Brain Atlas

Lein et al., 2004

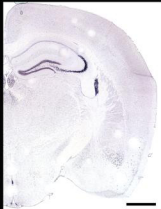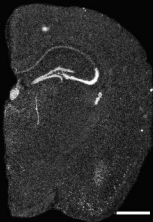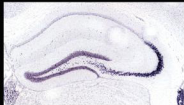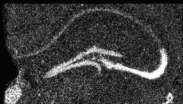



Tiam1

Allen Brain Atlas

Lein et al., 2004

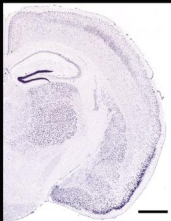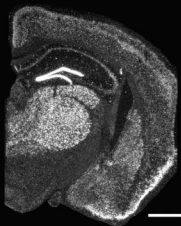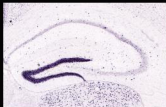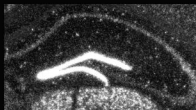

Tle1

Allen Brain Atlas

Lein et al, 2004

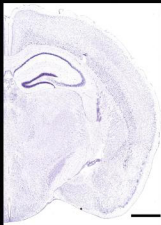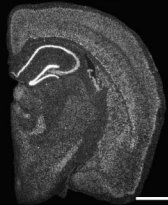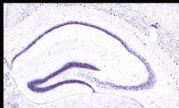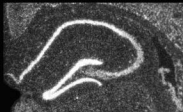

Tyro3

Allen Brain Atlas

Lein et al., 2004

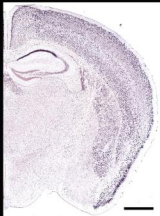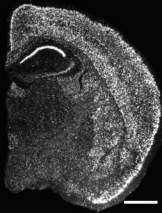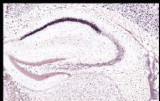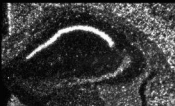

Usp11

Allen Brain Atlas

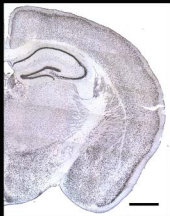

Lein et al., 2004

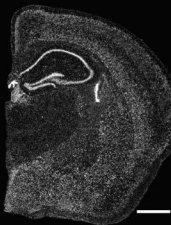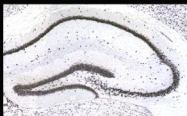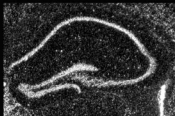

Ybx1

Allen Brain Atlas

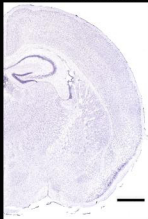

Lein et al., 2004

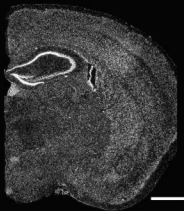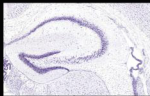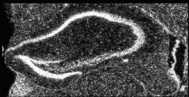

Zfp312

Allen Brain Atlas

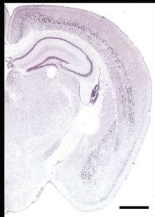

Lein et al., 2004

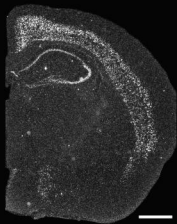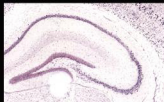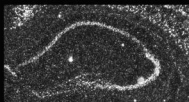

**Figure 2.** Representative images for each gene described in Table 1 (Cross Platform Validation document) were collected from the data generated by the ABA and Lein et al. The presented images were selected to match for hippocampal region. Higher magnification images of the hippocampus are presented below. When appropriate, additional images of data from the ABA are presented in order to demonstrate concordance of the extra-hippocampal expression pattern.
